# Supplementary material for: Fine mapping of the HLA locus in Parkinson’s disease in Europeans
Source: bioRxiv or medRxiv preprint supplement (doi:10.1101/2020.10.29.20217059), 2021-01-14

**IPDGC European PCA plot**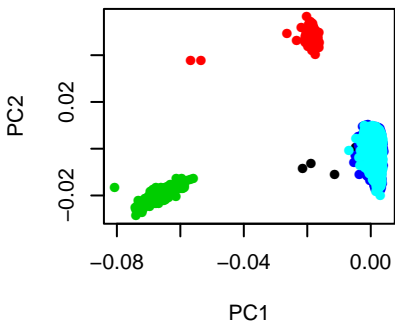**McGill European PCA plot**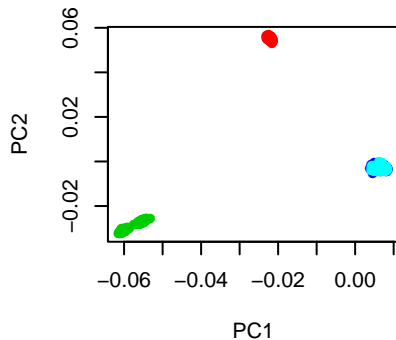**NINDS European PCA plot**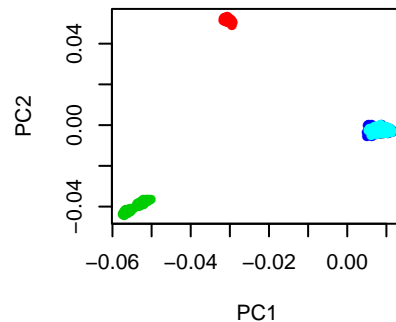**NGRC European PCA plot**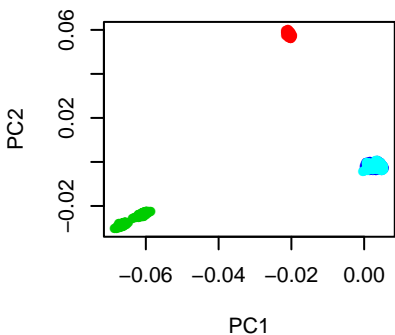**Oslo European PCA plot**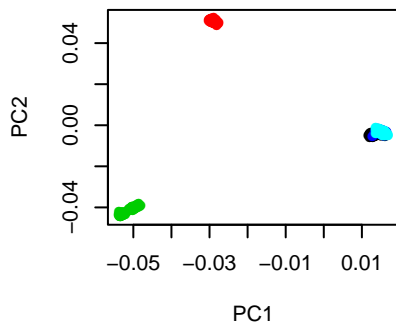**PPMI European PCA plot**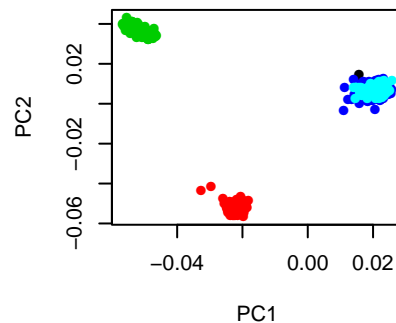**Vance European PCA plot**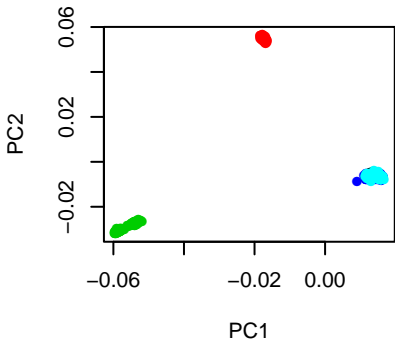**UKB European PCA plot**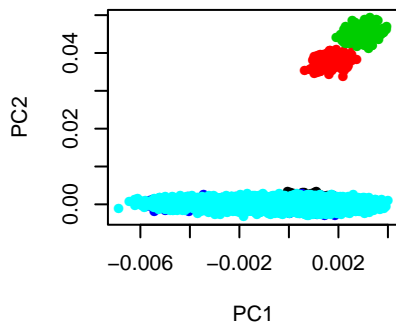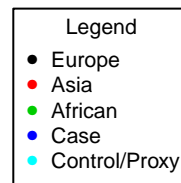

Supplement: Supplementary file [file media-2.pdf]
